# Supplementary material
Source: publisher figshare collection journal article supplement (https://tandf.figshare.com/articles/dataset/_/5440063)
Supplement: Supplementary file 1 [file 1]

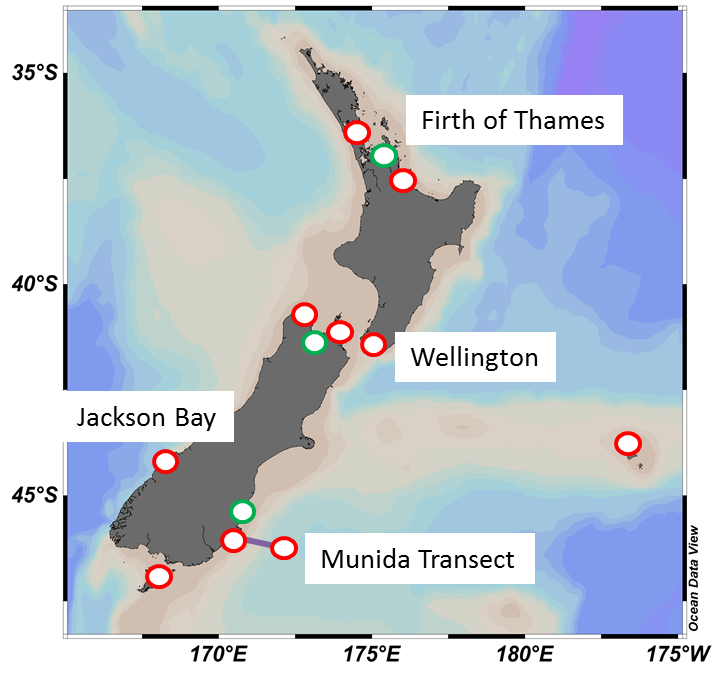


Figure S1. Location of New Zealand coastal time-series stations, with CARIM sites indicated by green circles and NZOA-ON sites by red circles. Sites mentioned in the text are also labelled.
